# Supplementary material for: Correlation of [68Ga]Ga-PSMA PET/CT response and PSA decline in first-line enzalutamide for metastatic castration-resistant prostate cancer patients
Source: Springer Nature journal article supplement (doi:10.1007/s00259-024-06887-4), 2024-08-29
Supplement: MOESM1 [file 259_2024_6887_MOESM1_ESM.docx]

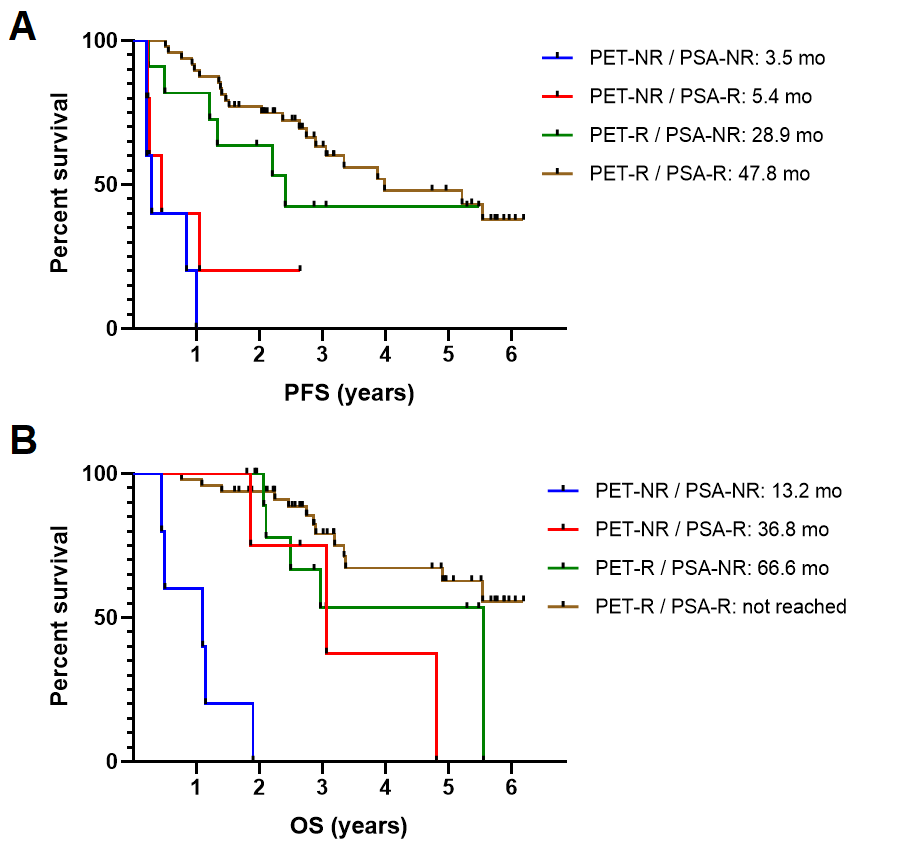


**Figure S1.** PFS and OS according to the division in these 4 groups. Mo, months; OS, overall survival; PET-NR, PSMA PET non-responder; PET-R, PSMA PET responder; PFS, progression free survival; PSA-NR, PSA non-responder; PSA-R, PSA responder.
