# Supplementary material for: Correlation of [68Ga]Ga-PSMA PET/CT response and PSA decline in first-line enzalutamide for metastatic castration-resistant prostate cancer patients
Source: Springer Nature journal article supplement (doi:10.1007/s00259-024-06887-4), 2024-08-29
Supplement: MOESM2 [file 259_2024_6887_MOESM2_ESM.docx]

**Supplementary material**

| **PSMA PET/**  **PSA response** | **OS (months)** | **Death** | **PSA change (%)** |
| --- | --- | --- | --- |
| PET-NR/PSA-R | 21.6 | No | -81 |
| PET-NR/PSA-R | 22.3 | Yes | -65 |
| PET-NR/PSA-R | 31.7 | No | -99 |
| PET-NR/PSA-R | 36.8 | Yes | -78 |
| PET-NR/PSA-R | 57.7 | Yes | -81 |
| PET-R/PSA-NR | 23.1 | No | +52 |
| PET-R/PSA-NR | 23.5 | No | -38 |
| PET-R/PSA-NR | 24.8 | Yes | -11 |
| PET-R/PSA-NR | 25.3 | Yes | -47 |
| PET-R/PSA-NR | 30.0 | Yes | -49 |
| PET-R/PSA-NR | 34.4 | No | +10 |
| PET-R/PSA-NR | 35.6 | Yes | -48 |
| PET-R/PSA-NR | 36.7 | No | -19 |
| PET-R/PSA-NR | 63.5 | No | -36 |
| PET-R/PSA-NR | 65.7 | No | -32 |
| PET-R/PSA-NR | 66.6 | Yes | -15 |

**Table S1**. Details of 16 patients with PET/PSA discordance. OS, overall survival; PSA-NR, PSA non-responder patients; PET-R, PET responder patients; PET-NR, PSMA PET non-responder patients; PET-R, PSMA PET responder patients
